# Supplementary material for: The Evolutionary Basis of Naturally Diverse Rice Leaves Anatomy
Source: PubMed Central journal article supplement (PMC5085062; doi:10.1371/journal.pone.0164532), 2016-10-28
Supplement: pone.0164532.s004.pdf [file pone.0164532.s004.pdf]

**S1 Table. Leaf length and leaf width of *Oryza* species.**

The average leaf blade length (LL) and leaf width (LW) are computed taking nine leaves per species (N = 9) from three different plants. The length is measured from base to tip and the width is measured at the middle of the leaf. Leaf types (described in the Result section) are mentioned for each *Oryza* species.

| Genome | <i>Oryza</i> species     | IRGC accession number | Leaf length (LL***, cm) | Leaf width (LW***, cm) | Category     |
|--------|--------------------------|-----------------------|-------------------------|------------------------|--------------|
| KKLL   | <i>O. coarctata</i>      | 104502                | 30.44±2.01 (lm)         | 0.68±0.08 (no)         | Short-narrow |
| HHKK   | <i>O. schlechteri</i>    | 82047                 | 15.11±1.83 (q)          | 0.52±0.1 (o)           | Short-narrow |
| HHJJ   | <i>O. longiglumis</i>    | 105148                | 32.22±2.86 (l)          | 1.53±0.09 (fg)         | Short-wide   |
| HHJJ   | <i>O. ridleyi</i>        | 100821                | 36±3.61 (kl)            | 1.86±0.17 (d)          | Short-wide   |
| GG     | <i>O. meyeriana</i>      | 89241                 | 16.33±1.5 (q)           | 1.88±0.23 (d)          | Short-wide   |
| GG     | <i>O. granulata</i>      | 102118                | 17.67±2.12 (op)         | 1.92±0.17 (d)          | Short-wide   |
| FF     | <i>O. brachyantha</i>    | 101232                | 18.78±1.09 (opq)        | 0.64±0.05 (no)         | Short-narrow |
| EE     | <i>O. australiensis</i>  | 100882                | 62.67±3.91 (cd)         | 1.42±0.14 (fgh)        | Long-narrow  |
| CCDD   | <i>O. grandiglumis</i>   | 106241                | 72.0±5.6 (ef)           | 2.61±0.58 (b)          | Long-wide    |
| CCDD   | <i>O. latifolia</i>      | 105173                | 78.3±6.5 (gh)           | 2.7±0.1 (c)            | Long-wide    |
| CCDD   | <i>O. alta</i>           | 105143                | 75.8±4.2 (bc)           | 3.28±0.71 (a)          | Long-wide    |
| CC     | <i>O. rhizomatis</i>     | 105659                | 68.67±11.55 (nop)       | 2.94±0.2 (lm)          | Long-wide    |
| CC     | <i>O. officinalis</i>    | 100896                | 58.2±19.4 (hij)         | 1.9±0.28 (de)          | Long-wide    |
| CC     | <i>O. eichingeri</i>     | 101422                | 24.56±3.32 (no)         | 1.18±0.1 (ijk)         | Short-wide   |
| BCC    | <i>O. minuta</i>         | 101141                | 25.56±3.81 (mn)         | 1.31±0.18 (ghi)        | Short-wide   |
| BB     | <i>O. punctata</i>       | 105690                | 62.22±6.1 (ij)          | 1.4±0.11 (jkl)         | Long-wide    |
| AA     | <i>O. glumaepatula</i>   | 106242                | 68.1±3.6 (ed)           | 1.49±0.27 (fg)         | Long-wide    |
| AA     | <i>O. longistaminata</i> | 110404                | 89.44±11.83 (a)         | 1.62±0.22 (ef)         | Long-wide    |
| AA     | <i>O. rufipogon</i>      | 106424                | 74.5±1.6 (hij)          | 1.9±0.17 (hij)         | Long-wide    |
| AA     | <i>O. meridionalis</i>   | 105301                | 53.22±11.12 (fg)        | 0.94±0.09 (lm)         | Long-narrow  |
| AA     | <i>O. barthii</i>        | 106017                | 59.78±4.55 (ed)         | 0.98±0.07 (klm)        | Long-narrow  |
| AA     | <i>O. nivara</i>         | 80723                 | 47.56±7.06 (ghi)        | 0.83±0.1 (mn)          | Long-narrow  |
| AA     | <i>O. glaberrima</i>     | 103544                | 60.7±4.2 (b)            | 1.2±0.1 (fg)           | Long-narrow  |
| AA     | <i>O. sativa</i>         | IR 64 - 21            | 41.00±8.51 (jk)         | 0.97±0.11 (klm)        | Long-narrow  |

\*\*\* Represents significant difference among the species for the trait at  $P < 0.001$ .

N = 9 Different letters suggest significant differences.
