# Supplementary material for: The Evolutionary Basis of Naturally Diverse Rice Leaves Anatomy
Source: PubMed Central journal article supplement (PMC5085062; doi:10.1371/journal.pone.0164532), 2016-10-28
Supplement: pone.0164532.s005.pdf [file pone.0164532.s005.pdf]

**S2 Table. Leaf thickness of *Oryza* species.**

Leaf thickness (LT) is quantified by measuring vertical length of at least 3 transverse sections of 10 leaves per species (N = 30). LT values are represented as the average  $\pm$  SD. LT varies significantly ( $P < 0.0001$ ) among the species.

| Genome | <i>Oryza</i> species     | IRGC accession number | Leaf thickness (LT***, $\mu\text{m}$ ) |
|--------|--------------------------|-----------------------|----------------------------------------|
| KKLL   | <i>O. coarctata</i>      | 104502                | 375.78 $\pm$ 11 (a)                    |
| HHKK   | <i>O. schlechteri</i>    | 82047                 | 78.95 $\pm$ 8.6 (ijk)                  |
| HHJJ   | <i>O. longiglumis</i>    | 105148                | 75.34 $\pm$ 3.8 (jkl)                  |
| HHJJ   | <i>O. ridleyi</i>        | 100821                | 74.88 $\pm$ 4.2 (kl)                   |
| GG     | <i>O. meyeriana</i>      | 89241                 | 69.3 $\pm$ 5.1 (lm)                    |
| GG     | <i>O. granulata</i>      | 102118                | 61.18 $\pm$ 3.5 (n)                    |
| FF     | <i>O. brachyantha</i>    | 101232                | 107.3 $\pm$ 25.7 (d)                   |
| EE     | <i>O. australiensis</i>  | 100882                | 116.86 $\pm$ 15.4 (c)                  |
| CCDD   | <i>O. grandiglumis</i>   | 106241                | 96.35 $\pm$ 7.1 (e)                    |
| CCDD   | <i>O. latifolia</i>      | 105173                | 84.88 $\pm$ 4.4 (ghi)                  |
| CCDD   | <i>O. alta</i>           | 105143                | 142.52 $\pm$ 31.1 (b)                  |
| CC     | <i>O. rhizomatis</i>     | 105659                | 81.99 $\pm$ 3.5 (hij)                  |
| CC     | <i>O. officinalis</i>    | 100896                | 86.49 $\pm$ 9.8 (fgh)                  |
| CC     | <i>O. eichingeri</i>     | 101422                | 78.75 $\pm$ 11.2 (ijk)                 |
| BBCC   | <i>O. minuta</i>         | 101141                | 109.69 $\pm$ 10.9 (d)                  |
| BB     | <i>O. punctata</i>       | 105690                | 53.76 $\pm$ 4.2 (o)                    |
| AA     | <i>O. glumaepatula</i>   | 106242                | 85.76 $\pm$ 4.5 (ghi)                  |
| AA     | <i>O. longistaminata</i> | 110404                | 84.52 $\pm$ 4.0 (hi)                   |
| AA     | <i>O. rufipogon</i>      | 106424                | 91.76 $\pm$ 9.2 (efg)                  |
| AA     | <i>O. meridionalis</i>   | 105301                | 93.31 $\pm$ 7.2 (ef)                   |
| AA     | <i>O. barthii</i>        | 106017                | 72.68 $\pm$ 6.3 (klm)                  |
| AA     | <i>O. nivara</i>         | 80723                 | 67.02 $\pm$ 3.9 (mn)                   |
| AA     | <i>O. glaberrima</i>     | 103544                | 65.68 $\pm$ 7.7 (mn)                   |
| AA     | <i>O. sativa</i> cv IR64 | IR64-21               | 74.00 $\pm$ 5.7 (lm)                   |

\*\*\* Represents significant difference among the species for the trait at  $P < 0.001$ . Different letters suggest significant differences.

N = 30
