# Supplementary material for: The Evolutionary Basis of Naturally Diverse Rice Leaves Anatomy
Source: PubMed Central journal article supplement (PMC5085062; doi:10.1371/journal.pone.0164532), 2016-10-28
Supplement: pone.0164532.s006.pdf [file pone.0164532.s006.pdf]

**S3 Table. Vein characters of *Oryza* species.**

Veins (V) are counted at 1 mm lateral space at both the left and right side of the leaf, taking 10 leaves per species (N = 20). Vein related anatomical parameters are quantified by examining at least three leaf transverse sections per leaf. Values are presented as average  $\pm$  SD. All the traits show significant ( $P < 0.0001$ ) difference in wild rice. Considering the consistent oval structure of veins in all the species, only the lateral diameter or the vein, i.e., vein width is included for ANOVA.

| Genome | <i>Oryza</i> species     | IRGC accession number | Vein density (VD***, count) | Inter-veinal distance (IVD***, $\mu\text{m}$ ) | Inter-veinal mesophyll tissue length (TML = IVD X MCN, $\mu\text{m}$ ) | Vein width (VW***, $\mu\text{m}$ ) | Vein height (VH, $\mu\text{m}$ ) |
|--------|--------------------------|-----------------------|-----------------------------|------------------------------------------------|------------------------------------------------------------------------|------------------------------------|----------------------------------|
| KKLL   | <i>O. coarctata</i>      | 104502                | 5 $\pm$ 0.4 (efg)           | 226.2 $\pm$ 7.4 (cd)                           | 85.08 $\pm$ 1.86                                                       | 36.50 $\pm$ 4.3 (bc)               | 42 $\pm$ 3.45                    |
| HHKK   | <i>O. schlechteri</i>    | 82047                 | 6.4 $\pm$ 0.4 (ab)          | 153.43 $\pm$ 14.5 (l)                          | 90.12 $\pm$ 1.8                                                        | 22.32 $\pm$ 2.5 (l)                | 24.43 $\pm$ 3.62                 |
| HHJJ   | <i>O. longiglumis</i>    | 105148                | 6.2 $\pm$ 0.5 (b)           | 147.92 $\pm$ 14.7 (m)                          | 88.27 $\pm$ 1.55                                                       | 25.11 $\pm$ 4.04 (jk)              | 26.44 $\pm$ 3.17                 |
| HHJJ   | <i>O. ridleyi</i>        | 100821                | 6.25 $\pm$ 0.7 (b)          | 162.97 $\pm$ 2.9 (jkl)                         | 129.72 $\pm$ 2.86                                                      | 22.51 $\pm$ 2.6 (kl)               | 29.5 $\pm$ 1.5                   |
| GG     | <i>O. meyeriana</i>      | 89241                 | 5.89 $\pm$ 1.09 (c)         | 199.9 $\pm$ 15.1 (fg)                          | 126.21 $\pm$ 3.38                                                      | 17.60 $\pm$ 2.2 (m)                | 22.29 $\pm$ 1.86                 |
| GG     | <i>O. granulata</i>      | 102118                | 5.8 $\pm$ 0.5 (c)           | 159.74 $\pm$ 14.8 (kl)                         | 67.17 $\pm$ 0.99                                                       | 23.25 $\pm$ 1.7 (kl)               | 25 $\pm$ 1.5                     |
| FF     | <i>O. brachyantha</i>    | 101232                | 6.67 $\pm$ 0.7 (a)          | 143.53 $\pm$ 25.8 (m)                          | 88.22 $\pm$ 3.21                                                       | 27.78 $\pm$ 4.9 (jkl)              | 25 $\pm$ 2.33                    |
| EE     | <i>O. australiensis</i>  | 100882                | 5.15 $\pm$ 0.6 (ef)         | 166.4 $\pm$ 9.2 (ijk)                          | 132.3 $\pm$ 2.58                                                       | 31.95 $\pm$ 2.3 (cde)              | 37.5 $\pm$ 2.01                  |
| CCDD   | <i>O. grandiglumis</i>   | 106241                | 5.5 $\pm$ 0.6 (d)           | 181.55 $\pm$ 11.0 9 (ij)                       | 124.35 $\pm$ 2.89                                                      | 29.24 $\pm$ 3.9 (hi)               | 31.75 $\pm$ 4.45                 |
| CCDD   | <i>O. latifolia</i>      | 105173                | 4.9 $\pm$ 1.03 (fgh)        | 231.35 $\pm$ 10.24 (c)                         | 173.68 $\pm$ 2.89                                                      | 32.72 $\pm$ 2.9 (cdefg)            | 28.24 $\pm$ 2.83                 |
| CCDD   | <i>O. alta</i>           | 105143                | 4.6 $\pm$ 0.4 (ij)          | 253 $\pm$ 39.1 (a)                             | 202.65 $\pm$ 5.76                                                      | 36.92 $\pm$ 4.5 (b)                | 47.72 $\pm$ 47.72                |
| CC     | <i>O. rhizomatis</i>     | 105659                | 5.6 $\pm$ 0.4 (cd)          | 218.6 $\pm$ 17.1 (de)                          | 148.23 $\pm$ 1.9                                                       | 27.88 $\pm$ 4.3 (gh)               | 29.55 $\pm$ 4.84                 |
| CC     | <i>O. officinalis</i>    | 100896                | 4.9 $\pm$ 0.5 (d)           | 181.74 $\pm$ 8.9 (i)                           | 108.16 $\pm$ 3.22                                                      | 25.01 $\pm$ 2.8 (ij)               | 28.19 $\pm$ 3.01                 |
| CC     | <i>O. eichingeri</i>     | 101422                | 5.2 $\pm$ 0.7 (e)           | 190.41 $\pm$ 11.3 (h)                          | 123.77 $\pm$ 2.21                                                      | 20.99 $\pm$ 3.1 (m)                | 24.75 $\pm$ 3.74                 |
| BBCC   | <i>O. minuta</i>         | 101141                | 5.5 $\pm$ 0.4 (d)           | 172.82 $\pm$ 11.6 (ijk)                        | 98.96 $\pm$ 0.84                                                       | 31.85 $\pm$ 3.9 (cd)               | 37.5 $\pm$ 3.3                   |
| BB     | <i>O. punctata</i>       | 105690                | 4.75 $\pm$ 0.7 (ghi)        | 174.59 $\pm$ 17.3 (i)                          | 137.41 $\pm$ 1.35                                                      | 17.16 $\pm$ 2.4 (m)                | 20.78 $\pm$ 2.74                 |
| AA     | <i>O. glumaepatula</i>   | 106242                | 5.15 $\pm$ 0.4 (ef)         | 249.63 $\pm$ 17.0 7(b)                         | 213.99 $\pm$ 2.02                                                      | 40.06 $\pm$ 3.7 (a)                | 44.76 $\pm$ 6.23                 |
| AA     | <i>O. longistaminata</i> | 110404                | 3.85 $\pm$ 0.4 (k)          | 172.32 $\pm$ 33.3 (ij)                         | 161.72 $\pm$ 4.08                                                      | 32.68 $\pm$ 4.6 (fgh)              | 27.78 $\pm$ 4.47                 |
| AA     | <i>O. rufipogon</i>      | 106424                | 4.4 $\pm$ 0.5 (j)           | 204.81 $\pm$ 18.5 (fg)                         | 170.03 $\pm$ 5.22                                                      | 31.83 $\pm$ 4.09 (defg)            | 40.31 $\pm$ 5.44                 |
| AA     | <i>O. meridionalis</i>   | 105301                | 4.65 $\pm$ 0.9 (6)          | 205.66 $\pm$ 13.7 (fg)                         | 137.06 $\pm$ 1.86                                                      | 33.56 $\pm$ 5.3 (efgh)             | 39.38 $\pm$ 2.97                 |
| AA     | <i>O. barthii</i>        | 106017                | 4.55 $\pm$ 0.7 (ij)         | 212.61 $\pm$ 19.6 (ef)                         | 220.6 $\pm$ 3.1                                                        | 28.95 $\pm$ 3.2 (cdef)             | 33.33 $\pm$ 3.55                 |
| AA     | <i>O. nivara</i>         | 80723                 | 5.5 $\pm$ 0.9 (d)           | 154.84 $\pm$ 12.4 (kl)                         | 166.04 $\pm$ 0.58                                                      | 25.51 $\pm$ 2.2 (jkl)              | 29.54 $\pm$ 2.79                 |
| AA     | <i>O. glaberrima</i>     | 103544                | 5 $\pm$ 0.9 (ij)            | 229.91 $\pm$ 14.8 (cd)                         | 231.34 $\pm$ 1.28                                                      | 31.01 $\pm$ 3.8 (cd)               | 34.41 $\pm$ 4.3                  |
| AA     | <i>O. sativa</i> cv IR64 | IR64-21               | 5 $\pm$ 0.9 (ij)            | 196 $\pm$ 12.2 (gh)                            | 157.54 $\pm$ 3.6                                                       | 22.10 $\pm$ 3.6 (efgh)             | 29.5 $\pm$ 3.3                   |

\*\*\* Represents significant difference among the species for the trait at  $P < 0.001$ . Different letters suggest

N = 30 (N = 20 for VD) significant differences.
