# Supplementary material for: The Evolutionary Basis of Naturally Diverse Rice Leaves Anatomy
Source: PubMed Central journal article supplement (PMC5085062; doi:10.1371/journal.pone.0164532), 2016-10-28
Supplement: pone.0164532.s007.pdf [file pone.0164532.s007.pdf]

**S4 Table. Mesophyll cell characters of *Oryza* species.**

MC parameters are quantified examining at least 3 different sections per leaf and 10 leaves per species (N = 30). Values are presented as the average  $\pm$  SD. All traits show significant ( $P < 0.0001$ ) difference among different wild rice.

| Genome | <i>Oryza</i> species     | IRGC accession number | Mesophyll cell number (MCN***, count) | Mesophyll cell length (MCL***, $\mu\text{m}$ ) | Mesophyll cell height (MCH***, $\mu\text{m}$ ) | Mesophyll cell width (MCW***, $\mu\text{m}$ ) | Mesophyll cell lobing (LB <sub>MC</sub> ***, ratio) |
|--------|--------------------------|-----------------------|---------------------------------------|------------------------------------------------|------------------------------------------------|-----------------------------------------------|-----------------------------------------------------|
| KKLL   | <i>O. coarctata</i>      | 104502                | 4.00 $\pm$ 0.7 (j)                    | 21.27 $\pm$ 2.6 (j)                            | 14.49 $\pm$ 2.4 (cd)                           | 7.74 $\pm$ 0.8 (cdef)                         | 1.24 $\pm$ 0.1 (g)                                  |
| HHKK   | <i>O. schlechteri</i>    | 82047                 | 6.00 $\pm$ 0.5 (e)                    | 15.02 $\pm$ 3.3 (l)                            | 10.51 $\pm$ 1.6 (ij)                           | 9.78 $\pm$ 1.9 (c)                            | 1.01 $\pm$ 0.03 (h)                                 |
| HHJJ   | <i>O. longiglumis</i>    | 105148                | 6.5 $\pm$ 0.6 (cd)                    | 13.58 $\pm$ 2.3 (l)                            | 10.07 $\pm$ 1.7 (j)                            | 6.62 $\pm$ 1 (hijkl)                          | 1.08 $\pm$ 0.1 (h)                                  |
| HHJJ   | <i>O. ridleyi</i>        | 100821                | 6.00 $\pm$ 0.7 (de)                   | 21.62 $\pm$ 4.09 (hij)                         | 13.72 $\pm$ 2.7 (ef)                           | 7.70 $\pm$ 1.2 (cdef)                         | 1.10 $\pm$ 0.1 (h)                                  |
| GG     | <i>O. meyeriana</i>      | 89241                 | 7.42 $\pm$ 1.3 (a)                    | 17.01 $\pm$ 2.4 (k)                            | 15.07 $\pm$ 3.2 (d)                            | 12.77 $\pm$ 3.1 (a)                           | 1.07 $\pm$ 0.08 (h)                                 |
| GG     | <i>O. granulata</i>      | 102118                | 5.40 $\pm$ 0.5 (ghi)                  | 12.44 $\pm$ 1.8 (l)                            | 8.46 $\pm$ 5.09 (k)                            | 10.9 $\pm$ 2.02 (b)                           | 1 $\pm$ 0.08 (h)                                    |
| FF     | <i>O. brachyantha</i>    | 101232                | 6.20 $\pm$ 0.8 (de)                   | 14.23 $\pm$ 3.8 (l)                            | 11.02 $\pm$ 2.2 (hij)                          | 7.24 $\pm$ 0.7 (efghij)                       | 1.31 $\pm$ 0.1 (efg)                                |
| EE     | <i>O. australiensis</i>  | 100882                | 5.4 $\pm$ 0.5 (hi)                    | 24.50 $\pm$ 4.7 (efgh)                         | 11.43 $\pm$ 1.9 (ij)                           | 5.82 $\pm$ 0.6 (klmn)                         | 1.54 $\pm$ 0.1 (bcd)                                |
| CCDD   | <i>O. grandiglumis</i>   | 106241                | 4.53 $\pm$ 0.6 (j)                    | 27.45 $\pm$ 4.5 (d)                            | 15.27 $\pm$ 1.8 (cd)                           | 6.63 $\pm$ 0.9 (jklm)                         | 1.46 $\pm$ 0.1 (bcde)                               |
| CCDD   | <i>O. latifolia</i>      | 105173                | 5.77 $\pm$ 0.6 (ef)                   | 30.10 $\pm$ 4.3 (cd)                           | 17.36 $\pm$ 1.9 (bc)                           | 7.18 $\pm$ 0.6 (fghij)                        | 1.36 $\pm$ 0.02 (efg)                               |
| CCDD   | <i>O. alta</i>           | 105143                | 5.48 $\pm$ 0.7 (i)                    | 36.98 $\pm$ 7.38 (a)                           | 19.34 $\pm$ 3.6 (a)                            | 8.44 $\pm$ 0.7 (cd)                           | 1.49 $\pm$ 0.1 (cdef)                               |
| CC     | <i>O. rhizomatis</i>     | 105659                | 6.53 $\pm$ 0.5 (c)                    | 22.70 $\pm$ 3.7 (ij)                           | 12.36 $\pm$ 1.5 (ghi)                          | 7.37 $\pm$ 1.2 (defg)                         | 1.43 $\pm$ 0.1 (cdef)                               |
| CC     | <i>O. officinalis</i>    | 100896                | 5.31 $\pm$ 0.7 (i)                    | 20.37 $\pm$ 4.07 (j)                           | 12.70 $\pm$ 1.9 (efg)                          | 4.9 $\pm$ 0.7 (mn)                            | 1.39 $\pm$ 0.1 (cdef)                               |
| CC     | <i>O. eichingeri</i>     | 101422                | 5.73 $\pm$ 0.5 (fgh)                  | 21.60 $\pm$ 4.1 (j)                            | 13.21 $\pm$ 1.3 (d)                            | 7.33 $\pm$ 0.5 (efghi)                        | 1.39 $\pm$ 0.09 (defg)                              |
| BBCC   | <i>O. minuta</i>         | 101141                | 4.00 $\pm$ 0.7 (j)                    | 24.74 $\pm$ 1.2 (e)                            | 12.63 $\pm$ 2.07 (fghi)                        | 10.19 $\pm$ 0.9 (b)                           | 1.54 $\pm$ 0.2 (b)                                  |
| BB     | <i>O. punctata</i>       | 105690                | 6.11 $\pm$ 0.3 (e)                    | 22.49 $\pm$ 4.08 (fghij)                       | 12.07 $\pm$ 1.6 (fghi)                         | 7.51 $\pm$ 0.8 (efghi)                        | 1.33 $\pm$ 0.09 (fg)                                |
| AA     | <i>O. glumaepatula</i>   | 106242                | 6.85 $\pm$ 0.4 (ab)                   | 31.24 $\pm$ 4.7 (b)                            | 15.89 $\pm$ 1.6 (b)                            | 5.62 $\pm$ 0.8 (lmn)                          | 1.51 $\pm$ 0.1 (bc)                                 |
| AA     | <i>O. longistaminata</i> | 110404                | 6.50 $\pm$ 0.7 (cd)                   | 24.88 $\pm$ 5.1 (ef)                           | 13.12 $\pm$ 2.6 (efghi)                        | 7.97 $\pm$ 0.7 (cdef)                         | 1.48 $\pm$ 0.1 (cdef)                               |
| AA     | <i>O. rufipogon</i>      | 106424                | 7.37 $\pm$ 0.7 (a)                    | 23.07 $\pm$ 6.9 (ghij)                         | 13.22 $\pm$ 1.6 (e)                            | 6.6 $\pm$ 0.6 (defgh)                         | 1.57 $\pm$ 0.1 (bc)                                 |
| AA     | <i>O. meridionalis</i>   | 105301                | 5.88 $\pm$ 0.5 (efg)                  | 23.31 $\pm$ 3.6 (ef)                           | 13.27 $\pm$ 1.6 (ef)                           | 6.95 $\pm$ 0.6 (ijkl)                         | 1.72 $\pm$ 0.1 (a)                                  |
| AA     | <i>O. barthii</i>        | 106017                | 7.16 $\pm$ 0.8 (ab)                   | 30.81 $\pm$ 3.8 (bc)                           | 12.63 $\pm$ 1.7 (efgh)                         | 6.24 $\pm$ 1.2 (ijkl)                         | 1.53 $\pm$ 0.1 (bc)                                 |
| AA     | <i>O. nivara</i>         | 80723                 | 7.00 $\pm$ 0.2 (bc)                   | 23.72 $\pm$ 2.9 (efghi)                        | 12.51 $\pm$ 1.9 (efgh)                         | 4.99 $\pm$ 0.8 (n)                            | 1.60 $\pm$ 0.2 (b)                                  |
| AA     | <i>O. glaberrima</i>     | 103544                | 7.14 $\pm$ 0.2 (ab)                   | 32.40 $\pm$ 6.4 (b)                            | 12.01 $\pm$ 1.7 (fghi)                         | 7.06 $\pm$ 0.7 (ghijk)                        | 1.52 $\pm$ 0.1 (cdef)                               |
| AA     | <i>O. sativa</i> cv IR64 | IR64-21               | 6.60 $\pm$ 0.8 (bc)                   | 23.87 $\pm$ 4.4 (efg)                          | 12.54 $\pm$ 1.9 (efg)                          | 7.80 $\pm$ 1.02 (cde)                         | 1.56 $\pm$ 0.1 (bc)                                 |

\*\*\*Represents significant difference among the species for the trait at  $P < 0.001$ . Different letters suggest significant differences.
