# Supplementary material for: The Evolutionary Basis of Naturally Diverse Rice Leaves Anatomy
Source: PubMed Central journal article supplement (PMC5085062; doi:10.1371/journal.pone.0164532), 2016-10-28
Supplement: pone.0164532.s008.pdf [file pone.0164532.s008.pdf]

**S5 Table. Bundle sheath cell characters of *Oryza* species.**

BSC parameters are measured examining at least 3 different sections from 10 different leaves per species (N = 30). All traits except the BSC height showed significant ( $P < 0.0001$ ) difference in wild rice.

| Genome | <i>Oryza</i> species     | IRGC accession number | Bundle sheath cell number (BSCN***, count) | Bundle sheath cell width (BSCW***, $\mu\text{m}$ ) | Bundle sheath cell height (BSCH, $\mu\text{m}$ ) | Bundle sheath cell length (BSCL***, $\mu\text{m}$ ) |
|--------|--------------------------|-----------------------|--------------------------------------------|----------------------------------------------------|--------------------------------------------------|-----------------------------------------------------|
| KKLL   | <i>O. coarctata</i>      | 104502                | 7.91 $\pm$ 0.9 (fg)                        | 45.05 $\pm$ 8.6 (a)                                | 38.32 $\pm$ 12.01                                | 29.13 $\pm$ 2.5 (j)                                 |
| HHKK   | <i>O. schlechteri</i>    | 82047                 | 6.80 $\pm$ 0.3 (h)                         | 13.19 $\pm$ 3.67 (c)                               | 16.92 $\pm$ 3.03                                 | 40.13 $\pm$ 8.47 (efgh)                             |
| HHJJ   | <i>O. longiglumis</i>    | 105148                | 6.64 $\pm$ 0.4 (h)                         | 13.51 $\pm$ 2.6 (de)                               | 15.02 $\pm$ 2.86                                 | 69.14 $\pm$ 11.2 (bc)                               |
| HHJJ   | <i>O. ridleyi</i>        | 100821                | 7.00 $\pm$ 1.1 (h)                         | 10.32 $\pm$ 1.6 (hijk)                             | 12.77 $\pm$ 1.26                                 | 46.89 $\pm$ 9.03 (fghi)                             |
| GG     | <i>O. meyeriana</i>      | 89241                 | 7.25 $\pm$ 0.9 (gh)                        | 10.96 $\pm$ 1.8 (ijk)                              | 12.18 $\pm$ 2.43                                 | 67.35 $\pm$ 8.7 (bc)                                |
| GG     | <i>O. granulata</i>      | 102118                | 7.10 $\pm$ 0.8 (h)                         | 10.00 $\pm$ 3.3 (fghij)                            | 11.61 $\pm$ 2.13                                 | 57.00 $\pm$ 5.9 (cd)                                |
| FF     | <i>O. brachyantha</i>    | 101232                | 8.00 $\pm$ 0.9 (ef)                        | 12.01 $\pm$ 2.5 (def)                              | 13.75 $\pm$ 2.81                                 | 46.74 $\pm$ 4.9 (efgh)                              |
| EE     | <i>O. australiensis</i>  | 100882                | 8.14 $\pm$ 0.3 (def)                       | 12.00 $\pm$ 1.7 (efghi)                            | 14.84 $\pm$ 2.38                                 | 61.02 $\pm$ 14.9 (cde)                              |
| CCDD   | <i>O. grandiglumis</i>   | 106241                | 8.80 $\pm$ 0.3 (cd)                        | 13.00 $\pm$ 2.04 (efghi)                           | 13.28 $\pm$ 2.25                                 | 59.73 $\pm$ 13.9 (cdef)                             |
| CCDD   | <i>O. latifolia</i>      | 105173                | 9.50 $\pm$ 1 (c)                           | 13.86 $\pm$ 2.28 (cde)                             | 15.24 $\pm$ 2.31                                 | 67.78 $\pm$ 11.2 (bcd)                              |
| CCDD   | <i>O. alta</i>           | 105143                | 11.50 $\pm$ 0.9 (a)                        | 20.18 $\pm$ 3.7 (b)                                | 20.93 $\pm$ 2.97                                 | 66.43 $\pm$ 15.2 (cdef)                             |
| CC     | <i>O. rhizomatis</i>     | 105659                | 8.33 $\pm$ 0.7 (def)                       | 11.54 $\pm$ 2.5 (efghi)                            | 12.20 $\pm$ 1.98                                 | 47.63 $\pm$ 6.5 (fgh)                               |
| CC     | <i>O. officinalis</i>    | 100896                | 8.14 $\pm$ 0.6 (def)                       | 11.93 $\pm$ 1.5 (efgh)                             | 13.91 $\pm$ 3.56                                 | 62.57 $\pm$ 9.8 (bcd)                               |
| CC     | <i>O. eichingeri</i>     | 101422                | 8.20 $\pm$ 0.3 (def)                       | 11.56 $\pm$ 2.3 (cd)                               | 12.86 $\pm$ 2.63                                 | 83.77 $\pm$ 10.1 (a)                                |
| BBCC   | <i>O. minuta</i>         | 101141                | 8.16 $\pm$ 1.1 (d)                         | 15.81 $\pm$ 0.92 (c)                               | 15.84 $\pm$ 3.83                                 | 59.00 $\pm$ 8.7 (cdef)                              |
| BB     | <i>O. punctata</i>       | 105690                | 7.60 $\pm$ 1.1 (de)                        | 9.65 $\pm$ 2.8 (ghij)                              | 10.26 $\pm$ 1.57                                 | 72.47 $\pm$ 10.09 (ab)                              |
| AA     | <i>O. glumaepatula</i>   | 106242                | 11.60 $\pm$ 0.5 (a)                        | 12.40 $\pm$ 1.8 (efg)                              | 14.31 $\pm$ 2.13                                 | 41.00 $\pm$ 12.5 (hi)                               |
| AA     | <i>O. longistaminata</i> | 110404                | 11.25 $\pm$ 1.1 (a)                        | 10.93 $\pm$ 2.2 (ijk)                              | 12.08 $\pm$ 2.83                                 | 57.16 $\pm$ 6.2 (ghi)                               |
| AA     | <i>O. rufipogon</i>      | 106424                | 12.50 $\pm$ 0.7 (a)                        | 10.18 $\pm$ 2.4 (ijk)                              | 10.64 $\pm$ 2.02                                 | 60.65 $\pm$ 15.04 (cdef)                            |
| AA     | <i>O. meridionalis</i>   | 105301                | 11.60 $\pm$ 0.9 (a)                        | 10.49 $\pm$ 2.1 (hijk)                             | 11.93 $\pm$ 2.28                                 | 65.33 $\pm$ 10.7 (bcd)                              |
| AA     | <i>O. barthii</i>        | 106017                | 10.20 $\pm$ 0.5 (b)                        | 8.95 $\pm$ 1.9 (jk)                                | 10.42 $\pm$ 2.4                                  | 53.31 $\pm$ 15.8 (defg)                             |
| AA     | <i>O. nivara</i>         | 80723                 | 11.50 $\pm$ 0.7 (a)                        | 8.78 $\pm$ 1.4 (k)                                 | 10.35 $\pm$ 1.5                                  | 49.06 $\pm$ 10.9 (ghi)                              |
| AA     | <i>O. glaberrima</i>     | 103544                | 11.18 $\pm$ 1.3 (a)                        | 9.36 $\pm$ 1.9 (fghij)                             | 10.90 $\pm$ 1.8                                  | 45.12 $\pm$ 12.3 (ij)                               |
| AA     | <i>O. sativa</i> cv IR64 | IR64-21               | 12.50 $\pm$ 0.5 (a)                        | 9.57 $\pm$ 2.01 (jk)                               | 11.24 $\pm$ 2.01                                 | 53.55 $\pm$ 11.01 (ghi)                             |

\*\*\* Represents significant difference among the species for the trait at  $P < 0.001$ . Different letters suggest significant differences.

N = 30
