# Supplementary material for: The Evolutionary Basis of Naturally Diverse Rice Leaves Anatomy
Source: PubMed Central journal article supplement (PMC5085062; doi:10.1371/journal.pone.0164532), 2016-10-28
Supplement: pone.0164532.s009.pdf [file pone.0164532.s009.pdf]

**S6 Table. Detailed anatomical characters of three high yielding *Oryza sativa* cultivars IR64, IR24 and IR31917.**

| <b>Cultivars</b>            | <b>Leaf thickness, LT)</b> | <b>Inter-veinal distance (IVD, <math>\mu\text{m}</math>)</b> | <b>Inter-veinal total mesophyll length (TML, <math>\mu\text{m}</math>)</b> | <b>Mesophyll cell number (MCN, count)</b> | <b>Mesophyll cell length (MCL, <math>\mu\text{m}</math>)</b> | <b>Mesophyll cell height (MCH, <math>\mu\text{m}</math>)</b> | <b>Mesophyll cell width (MCW, <math>\mu\text{m}</math>)</b> | <b>Mesophyll cell lobing (<math>\text{LB}_{\text{MC}}</math>, ratio)</b> |
|-----------------------------|----------------------------|--------------------------------------------------------------|----------------------------------------------------------------------------|-------------------------------------------|--------------------------------------------------------------|--------------------------------------------------------------|-------------------------------------------------------------|--------------------------------------------------------------------------|
| <i>O. sativa</i> cv IR64    | 74 $\pm$ 5.7               | 196 $\pm$ 12.2                                               | 157.54 $\pm$ 3.6                                                           | 6.6 $\pm$ 0.8                             | 23.87 $\pm$ 4.4                                              | 12.54 $\pm$ 1.9                                              | 7.8 $\pm$ 1.02                                              | 1.56 $\pm$ 0.1                                                           |
| <i>O. sativa</i> cv IR24    | 87.63 $\pm$ 7.57           | 213.12 $\pm$ 21.22                                           | 169.3 $\pm$ 2.42                                                           | 6.6 $\pm$ 0.58                            | 25.65 $\pm$ 4.19                                             | 14.93 $\pm$ 1.07                                             | 7.88 $\pm$ 1.13                                             | 1.5 $\pm$ 0.1                                                            |
| <i>O. sativa</i> cv IR31917 | 77.86 $\pm$ 6.51           | 221.1 $\pm$ 12.06                                            | 190.64 $\pm$ 1.77                                                          | 7 $\pm$ 0.4                               | 27.23 $\pm$ 4.41                                             | 12.43 $\pm$ 1.3                                              | 6.23 $\pm$ 0.76                                             | 1.59 $\pm$ 0.09                                                          |
| N = 30, 20 for VD           |                            |                                                              |                                                                            |                                           |                                                              |                                                              |                                                             |                                                                          |

**S6 Table continued.**

| <b>Cultivars</b>            | <b>Bundle sheath cell number (BSCN, count)</b> | <b>Bundle sheath cell width (BSCW, <math>\mu\text{m}</math>)</b> | <b>Bundle sheath cell height (BSCH, <math>\mu\text{m}</math>)</b> | <b>Bundle sheath cell length (BSCL, <math>\mu\text{m}</math>)</b> | <b>Vein density (VD, count)</b> | <b>Vein width (VW, <math>\mu\text{m}</math>)</b> | <b>Vein height (VH, <math>\mu\text{m}</math>)</b> |
|-----------------------------|------------------------------------------------|------------------------------------------------------------------|-------------------------------------------------------------------|-------------------------------------------------------------------|---------------------------------|--------------------------------------------------|---------------------------------------------------|
| <i>O. sativa</i> cv IR64    | 12.5 $\pm$ 0.5                                 | 9.57 $\pm$ 2.01                                                  | 11.24 $\pm$ 2.01                                                  | 53.55 $\pm$ 11.01                                                 | 5 $\pm$ 0.9                     | 22.1 $\pm$ 3.6                                   | 29.5 $\pm$ 3.3                                    |
| <i>O. sativa</i> cv IR24    | 12.4 $\pm$ 0.5                                 | 12.03 $\pm$ 1.42                                                 | 12.66 $\pm$ 1.77                                                  | 68.4 $\pm$ 16.97                                                  | 5 $\pm$ 0.5                     | 33.76 $\pm$ 5.98                                 | 33.5 $\pm$ 2.3                                    |
| <i>O. sativa</i> cv IR31917 | 12.0 $\pm$ 0.5                                 | 12.92 $\pm$ 1.56                                                 | 13.88 $\pm$ 1.39                                                  | 52.7 $\pm$ 11.4                                                   | 5 $\pm$ 0.4                     | 27.89 $\pm$ 1.69                                 | 29.5 $\pm$ 1.25                                   |
| N = 30, 20 for VD           |                                                |                                                                  |                                                                   |                                                                   |                                 |                                                  |                                                   |

All the anatomical parameters are as described in Material and Methods. Traits are quantified from the data collected from 10 leaves per accession and 3 sections (where required) per leaf. Values are the average  $\pm$  SD.
