# Supplementary material for: The Evolutionary Basis of Naturally Diverse Rice Leaves Anatomy
Source: PubMed Central journal article supplement (PMC5085062; doi:10.1371/journal.pone.0164532), 2016-10-28
Supplement: pone.0164532.s010.pdf [file pone.0164532.s010.pdf]

**S7 Table. Detailed anatomical characters of distant wild rice species.**

| Species                       | IRGC Accession number | Leaf thickness (LT, $\mu\text{m}$ ) | Inter-veinal distance (IVD, $\mu\text{m}$ ) | Inter-veinal total mesophyll length (TML, $\mu\text{m}$ ) | Mesophyll cell number (MCN, count) | Mesophyll cell length (MCL, $\mu\text{m}$ ) | Mesophyll cell height (MCH, $\mu\text{m}$ ) |
|-------------------------------|-----------------------|-------------------------------------|---------------------------------------------|-----------------------------------------------------------|------------------------------------|---------------------------------------------|---------------------------------------------|
| <i>Hygroryza aristata</i>     | 105457                | 91.98 $\pm$ 7.66                    | 296.24 $\pm$ 7.6                            | 142.01 $\pm$ 15.31                                        | 7.33 $\pm$ 1.15                    | 20.37 $\pm$ 4.78                            | 11.15 $\pm$ 2.07                            |
| <i>Luziola leiocarpa</i>      | 82043                 | 66.08 $\pm$ 6.5                     | 141.85 $\pm$ 5.92                           | 90.21 $\pm$ 7.78                                          | 5.38 $\pm$ 0.52                    | 17.24 $\pm$ 3.97                            | 10.06 $\pm$ 1.26                            |
| <i>Rhynchoryza subulata</i>   | 100913                | 146.83 $\pm$ 11.97                  | 169.56 $\pm$ 8.56                           | 94.82 $\pm$ 13.37                                         | 5.2 $\pm$ 0.45                     | 16.05 $\pm$ 3.42                            | 10.6 $\pm$ 1.5                              |
| <i>Zizanopsis villanensis</i> | 85425                 | 189.21 $\pm$ 4.29                   | 234.98 $\pm$ 7.02                           | 119.57 $\pm$ 36.89                                        | 5.4 $\pm$ 0.89                     | 21.59 $\pm$ 3.01                            | 15.35 $\pm$ 2.65                            |
| <i>Chikusichloa aquatica</i>  | 106186                | 107.70 $\pm$ 13.9                   | 241.78 $\pm$ 33.22                          | 83.14 $\pm$ 4.49                                          | 4.5 $\pm$ 0.58                     | 24.43 $\pm$ 5.74                            | 8.91 $\pm$ 0.68                             |
| <i>Leersia tisseranti</i>     | 101384                | 75.31 $\pm$ 6.93                    | 161.76 $\pm$ 15.2                           | 109.79 $\pm$ 14.69                                        | 6.38 $\pm$ 0.52                    | 17.23 $\pm$ 3.26                            | 11.45 $\pm$ 1.83                            |

N = 30

**S7 Table continued.**

| Species                       | IRGC Accession number | Mesophyll cell lobing (LB <sub>MC</sub> , $\mu\text{m}$ ) | Bundle sheath cell number (BSCN, count) | Bundle sheath cell width (BSCW, $\mu\text{m}$ ) | Bundle sheath cell height (BSCH, $\mu\text{m}$ ) | Vein width (VW, $\mu\text{m}$ ) | Vein height (VH, $\mu\text{m}$ ) |
|-------------------------------|-----------------------|-----------------------------------------------------------|-----------------------------------------|-------------------------------------------------|--------------------------------------------------|---------------------------------|----------------------------------|
| <i>Hygroryza aristata</i>     | 105457                | 1 $\pm$ 0.1                                               | 8.14 $\pm$ 0.38                         | 14.66 $\pm$ 3.57                                | 16.86 $\pm$ 3.71                                 | 26.33 $\pm$ 4.61                | 31.42 $\pm$ 2.65                 |
| <i>Luziola leiocarpa</i>      | 82043                 | 1.17 $\pm$ 0.13                                           | 8.13 $\pm$ 0.35                         | 7.90 $\pm$ 1.28                                 | 9.37 $\pm$ 1.62                                  | 23.31 $\pm$ 2.63                | 25.21 $\pm$ 1.65                 |
| <i>Rhynchoryza subulata</i>   | 100913                | 1.25 $\pm$ 0.09                                           | 12.2 $\pm$ 1.3                          | 10.91 $\pm$ 1.91                                | 11.78 $\pm$ 2.61                                 | 34.38 $\pm$ 5.98                | 58.44 $\pm$ 12.58                |
| <i>Zizanopsis villanensis</i> | 85425                 | 1.48 $\pm$ 0.09                                           | 12 $\pm$ 1.41                           | 21.78 $\pm$ 2.89                                | 21.27 $\pm$ 2.5                                  | 55.19 $\pm$ 9.17                | 85.76 $\pm$ 9.5                  |
| <i>Chikusichloa aquatica</i>  | 106186                | 1.12 $\pm$ 0.06                                           | 8.83 $\pm$ 1.17                         | 16.37 $\pm$ 3.84                                | 14.17 $\pm$ 2.36                                 | 28.57 $\pm$ 3.01                | 37.26 $\pm$ 5.43                 |
| <i>Leersia tisseranti</i>     | 101384                | 1.38 $\pm$ 0.13                                           | 9.29 $\pm$ 0.49                         | 8.64 $\pm$ 1.85                                 | 10.05 $\pm$ 1.37                                 | 20.49 $\pm$ 2.55                | 24.86 $\pm$ 2.47                 |

N = 30

All the anatomical parameters are as described in Material and Methods. Traits are quantified from 3 sections per leaves and 10 leaves per species. Values are presented as the average  $\pm$  SD.
