# Supplementary material for: The Evolutionary Basis of Naturally Diverse Rice Leaves Anatomy
Source: PubMed Central journal article supplement (PMC5085062; doi:10.1371/journal.pone.0164532), 2016-10-28
Supplement: pone.0164532.s011.pdf [file pone.0164532.s011.pdf]

**S8 Table. NCBI accessions of the genes used in constructing the rice phylogenetic tree.**

| <b>Serial number</b> | <b>NCBI accession numbers of genes used in constructing <i>Oryza</i> phylogenetic tree</b>                              |
|----------------------|-------------------------------------------------------------------------------------------------------------------------|
| 1                    | gi 61099007 gb AY792585.1  Rhynchoryza subulata alcohol dehydrogenase II (Adh2) gene, exons 3 through 7 and partial cds |
| 2                    | >gi 7188539 gb AF148628.1  Porteresia coarctata alcohol dehydrogenase II (Adh2) gene, exons 3 through 7, partial cds    |
| 3                    | >gi 7188541 gb AF148629.1  Oryza schlechteri alcohol dehydrogenase II (Adh2) gene, exons 3 through 7, partial cds       |
| 4                    | >gi 7188533 gb AF148625.1  Oryza longiglumis alcohol dehydrogenase II (Adh2) gene, exons 3 through 7, partial cds       |
| 5                    | >gi 7188531 gb AF148624.1  Oryza ridleyi alcohol dehydrogenase II (Adh2) gene, exons 3 through 7, partial cds           |
| 6                    | >gi 7188543 gb AF148630.1  Oryza meyeriana alcohol dehydrogenase II (Adh2) gene, exons 3 through 7, partial cds         |
| 7                    | >gi 7188545 gb AF148631.1  Oryza granulata alcohol dehydrogenase II (Adh2) gene, exons 3 through 7, partial cds         |
| 8                    | >gi 7188547 gb AF148632.1  Oryza brachyantha alcohol dehydrogenase II (Adh2) gene, exons 3 through 7, partial cds       |
| 9                    | >gi 7188529 gb AF148623.1  Oryza australiensis alcohol dehydrogenase II (Adh2) gene, exons 3 through 7, partial cds     |
| 10                   | >gi 7188527 gb AF148622.1  Oryza grandiglumis alcohol dehydrogenase II (Adh2) gene, exons 3 through 7, partial cds      |
| 11                   | >gi 7188525 gb AF148621.1  Oryza latifolia alcohol dehydrogenase II (Adh2) gene, exons 3 through 7, partial cds         |
| 12                   | >gi 7188518 gb AF148617.1  Oryza alta alcohol dehydrogenase II (Adh2) gene, exons 3 through 7, partial cds              |
| 13                   | >gi 7188512 gb AF148614.1  Oryza rhizomatis alcohol dehydrogenase II (Adh2) gene, exons 3 through 7, partial cds        |
| 14                   | >gi 7188510 gb AF148613.1  Oryza officinalis alcohol dehydrogenase II (Adh2) gene, exons 3 through 7, partial cds       |
| 15                   | >gi 7188514 gb AF148615.1  Oryza eichingeri alcohol dehydrogenase II (Adh2) gene, exons 3 through 7, partial cds        |
| 16                   | >gi 7188516 gb AF148616.1  Oryza minuta alcohol dehydrogenase II (Adh2) gene, exons 3 through 7, partial cds            |
| 17                   | >gi 7188506 gb AF148611.1  Oryza punctata alcohol dehydrogenase II (Adh2) gene, exons 3 through 7, partial cds          |
| 18                   | >gi 7188494 gb AF148605.1  Oryza glumaepatula alcohol dehydrogenase II (Adh2) gene, exons 3 through 7, partial cds      |
| 19                   | >gi 7188498 gb AF148607.1  Oryza longistaminata alcohol dehydrogenase II (Adh2) gene, exons 3 through 7, partial cds    |
| 20                   | >gi 7188490 gb AF148603.1  Oryza rufipogon alcohol dehydrogenase II (Adh2) gene, exons 3 through 7, partial cds         |
| 21                   | >gi 7188502 gb AF148609.1  Oryza meridionalis alcohol dehydrogenase II (Adh2)                                           |

gene, exons 3 through 7, partial cds  
22 gi|7188500|gb|AF148608.1| *Oryza barthii* alcohol dehydrogenase II (Adh2) gene,  
exons 3 through 7, partial cds  
>gi|7188492|gb|AF148604.1| *Oryza nivara* alcohol dehydrogenase II (Adh2) gene,  
23 exons 3 through 7, partial cds  
>gi|7188496|gb|AF148606.1| *Oryza glaberrima* alcohol dehydrogenase II (Adh2)  
24 gene, exons 3 through 7, partial cds  
>gi|7188488|gb|AF148602.1| *Oryza sativa* alcohol dehydrogenase II (Adh2) gene,  
25 exons 3 through 7, partial cds  
gi|7158358|gb|AF148599.1| *Rhynchoryza subulata* alcohol dehydrogenase I (Adh1)  
26 gene, exons 3 through 7, partial cds  
gi|7158346|gb|AF148593.1| *Porteresia coarctata* alcohol dehydrogenase I (Adh1)  
27 gene, exons 3 through 7, partial cds  
gi|7158344|gb|AF148592.1| *Oryza schlechteri* alcohol dehydrogenase I (Adh1)  
28 gene, exons 3 through 7, partial cds  
gi|7158340|gb|AF148590.1| *Oryza ridleyi* H type alcohol dehydrogenase I (Adh1)  
29 gene, exons 3 through 7, partial cds  
gi|7158342|gb|AF148591.1| *Oryza longiglumis* H type alcohol dehydrogenase I  
30 (Adh1) gene, exons 3 through 7, partial cds  
gi|7158352|gb|AF148596.1| *Oryza meyeriana* alcohol dehydrogenase I (Adh1)  
31 gene, exons 3 through 7, partial cds  
gi|7158354|gb|AF148597.1| *Oryza granulata* alcohol dehydrogenase I (Adh1) gene,  
32 exons 3 through 7, partial cds  
gi|7158356|gb|AF148598.1| *Oryza brachyantha* alcohol dehydrogenase I (Adh1)  
33 gene, exons 3 through 7, partial cds  
gi|7158338|gb|AF148589.1| *Oryza australiensis* alcohol dehydrogenase I (Adh1)  
34 gene, exons 3 through 7, partial cds  
gi|7158336|gb|AF148588.1| *Oryza grandiglumis* D type alcohol dehydrogenase I  
35 (Adh1) gene, exons 3 through 7, partial cds  
gi|7158334|gb|AF148587.1| *Oryza latifolia* D type alcohol dehydrogenase I (Adh1)  
36 gene, exons 3 through 7, partial cds  
gi|7158326|gb|AF148583.1| *Oryza alta* C type alcohol dehydrogenase I (Adh1)  
37 gene, exons 3 through 7, partial cds  
gi|7158320|gb|AF148580.1| *Oryza rhizomatis* alcohol dehydrogenase I (Adh1)  
38 gene, exons 3 through 7, partial cds  
gi|7158312|gb|AF148576.1| *Oryza eichingeri* alcohol dehydrogenase I (Adh1) gene,  
39 exons 3 through 7, partial cds  
gi|7158318|gb|AF148579.1| *Oryza officinalis* alcohol dehydrogenase I (Adh1) gene,  
40 exons 3 through 7, partial cds  
gi|7158324|gb|AF148582.1| *Oryza minuta* C type alcohol dehydrogenase I (Adh1)  
41 gene, exons 3 through 7, partial cds  
gi|7158314|gb|AF148577.1| *Oryza punctata* alcohol dehydrogenase I (Adh1) gene,  
42 exons 3 through 7, partial cds  
gi|7158298|gb|AF148569.1| *Oryza rufipogon* alcohol dehydrogenase I (Adh1) gene,  
43 exons 3 through 7, partial cds  
44 gi|7158300|gb|AF148570.1| *Oryza nivara* alcohol dehydrogenase I (Adh1) gene,

exons 3 through 7, partial cds  
45 gi|7158310|gb|AF148575.1| *Oryza meridionalis* alcohol dehydrogenase I (Adh1)  
gene, exons 3 through 7, partial cds  
46 gi|7158306|gb|AF148573.1| *Oryza longistaminata* alcohol dehydrogenase I (Adh1)  
gene, exons 3 through 7, partial cds  
47 gi|7158302|gb|AF148571.1| *Oryza glumaepatula* alcohol dehydrogenase I (Adh1)  
gene, exons 3 through 7, partial cds  
48 gi|7158308|gb|AF148574.1| *Oryza barthii* alcohol dehydrogenase I (Adh1) gene,  
exons 3 through 7, partial cds  
49 gi|7158304|gb|AF148572.1| *Oryza glaberrima* alcohol dehydrogenase I (Adh1)  
gene, exons 3 through 7, partial cds  
50 gi|7158296|gb|AF148568.1| *Oryza sativa* subsp. *japonica* alcohol dehydrogenase I  
(Adh1) gene, exons 3 through 7, partial cds

---
